# Supplementary material for: Cryo-EM structures of human ZnT8 in both outward- and inward-facing conformations
Source: eLife. 2020 Jul 29;9:e58823. doi: 10.7554/eLife.58823 (PMC7428307; doi:10.7554/eLife.58823)
Supplement: Figure 2—source data 1. [file elife-58823-fig2-data1.xlsx]

## Sheet: Figure 2h
Figure 2h
	fluorescence readout
time	WT-1	WT-2	WT-3	WT-4	D110N D224N-1	D110N D224N-2	D110N D224N-3	D110N D224N-4	△HCH-1	△HCH-2	△HCH-3	△HCH-4	H106A H220A-1	H106A H220A-2	H106A H220A-3	H106A H220A-4	H137A H345A-1	H137A H345A-2	H137A H345A-3	H137A H345A-4	empty-1	empty-2	empty-3	empty-4
0	24.425	22.51	22.683	23.622	19.266	20.137	19.098	18.633	22.49	22.034	21.839	20.578	20.644	19.85	19.96	19.125	23.928	21.543	20.998	21.953	18.992	19.747	18.032	18.151
5	24.479	22.98	22.628	23.176	18.888	19.295	19.397	19.058	22.11	20.893	21.23	20.606	19.549	20.462	19.354	19.093	24.034	21.698	21.305	21.53	18.056	18.866	18.157	18.137
10	24.598	23.464	22.557	23.351	18.248	19.171	18.132	18.553	22.409	21.283	22.155	20.703	20.541	20.402	20.374	19.297	23.626	21.177	21.227	21.705	18.724	19.151	18.025	18.355
15	23.738	22.611	22.994	23.768	19.347	20.069	18.977	18.79	22.314	21.889	21.427	20.308	19.424	20.244	19.648	18.921	23.181	21.285	20.957	21.954	18.315	19.306	18.317	18.269
20	24.615	22.774	22.156	22.831	19.05	19.988	18.535	18.286	22.004	21.877	21.401	20.95	20.29	19.479	20.005	19.324	23.945	21.09	21.212	21.523	19.16	20.32	18.313	18.102
25	24.858	23.118	22.622	22.456	19.255	19.647	19.18	17.898	22.15	20.992	21.835	21.271	20.214	20.291	20.006	18.939	23.673	21.33	21.282	21.133	18.99	19.516	18.402	18.607
30	934.854	903.051	896.928	888.864	898.961	947.967	818.996	865.509	938.953	897.689	913.192	858.207	913.574	936.473	896.573	891.85	1008	960.354	921.624	968.138	932.701	971.284	862.565	857.256
35	894.734	867.646	851.045	855.274	888.977	944.711	810.912	851.114	930	877.693	896.818	855.423	907.536	924.818	881.258	885.097	986.087	946.438	899.165	943.942	932.762	970.586	866.271	857.004
40	845.974	818.885	809.571	820.586	882.668	938.896	804.698	840.941	919.045	864.77	887.877	848.637	894.23	912.281	877.605	876.022	961.415	929.807	883.072	931.641	927.794	976.453	861.638	851.266
45	811.385	787.261	774.2	796.607	867.104	933.975	792.866	833.005	908.191	850.13	866.966	842.759	884.922	892.608	864.471	868.931	948.895	912.731	872.007	915.635	928.886	970.226	856.544	850.239
50	782.635	755.56	747.698	764.782	862.982	924.651	783.267	819.306	896.484	842.845	855.788	829.174	881.253	887.634	861.178	858.407	935.636	903.003	855.285	900.156	918.477	964.372	854.495	849.501
55	758.199	732.838	722.822	743.466	856.311	910.12	778.582	811.076	888.418	834.701	837.036	819.508	874.744	886.028	852.366	851.289	919.664	888.025	845.602	882.049	913.304	938.509	852.255	835.242
60	737.182	716.655	698.626	730.073	853.049	904.628	777.072	806.756	881.934	824.53	826.54	812.663	871.185	873.504	837.924	840.831	908.278	877.291	837.349	879.527	907.393	918.43	838.452	835.175
65	724.097	705.727	681.494	714.776	845.496	897.646	770.624	801.984	872.494	830.351	823.266	807.262	858.329	866.004	833.695	833.976	903.446	869.658	825.367	861.77	901.192	910.672	836.635	835.753
70	715.614	693.826	658.072	705.06	841.452	892.251	766.387	793.857	865.142	816.901	822.274	802.603	852.365	858.999	831.258	826.27	887.492	859.441	819.858	853.987	902.451	905.818	840.564	826.941
75	699.123	670.721	644.92	690.304	835.494	875.381	761.371	791.78	859.398	808.273	816.105	798.398	851.919	851.65	821.612	821.211	884.34	849.641	808.501	852.413	892.676	900.536	825.849	818.367
80	686.687	666.807	628.826	683.379	828.73	868.719	758.285	785.752	849.956	804.619	811.276	796.541	844.898	847.819	822.288	820.075	874.07	840.611	801.255	839.11	886.402	900.832	824.39	819.472
85	676.078	656.843	613.964	673.178	825.251	853.609	753.419	780.217	844.987	796.092	802.232	785.769	838.65	841.838	817.282	812.345	865.429	837.551	795.451	835.352	885.205	895.263	820.011	818.546
90	675.686	649.116	603.976	666.984	820.569	839.658	752.461	776.318	842.843	793.41	800.309	787.236	840.601	839.866	818.49	809.55	858.778	834.342	787	828.231	884.073	897.31	816.826	813.573
95	663.927	641.389	590.125	658.478	817.512	821.594	752.607	770.765	837.716	786.686	795.559	781.404	824.413	832.198	808.934	806.352	851.303	825.755	786.116	825.224	876.957	896.421	814.238	812.449
100	655.255	629.125	577.498	647.512	812.989	818.291	750.36	770.994	828.904	784.933	788.119	779.503	830.716	833.326	807.281	803.045	851.746	818.312	779.333	811.839	875.942	896.166	811.941	810.879
105	649.616	625.576	573.92	646.45	809.198	812.851	753.284	771.212	824.316	778.235	786.555	773.681	826.229	828.106	807.077	802.151	841.824	818.482	774.996	809.192	873.075	883.598	807.617	803.072
110	645.775	622.138	562.434	639.408	808.585	809.635	747.683	764.073	819.39	780.737	787.253	772.966	824.385	824.301	801.001	793.386	838.206	811.136	771.009	804.869	876.983	883.63	807.362	803.894
115	633.915	618.248	554.75	634.067	810.78	813.368	741.328	763.317	821.086	779.233	784.575	772.495	823.548	819.333	800.592	796.821	833.67	805.943	767.914	801.65	869.641	875.414	804.797	799.687
120	623.423	609.967	548.549	626.975	801.658	802.444	741.948	758.617	809.836	774.393	779.508	768.289	818.711	814.512	801.185	792.17	829.539	803.812	760.452	796.728	868.782	876.092	802.014	797.591
125	617.527	603.298	543.279	622.616	802.592	802.713	737.363	759.339	810.57	773.553	779.769	766.271	815.905	812.47	795.238	790.035	823.369	799.029	755.958	789.608	865.441	872.641	801.192	798.07
130	609.488	599.268	537.038	616.498	795.964	804.601	735.203	755.003	807.777	769.643	775.785	757.962	808.218	810.723	794.595	783.862	815.492	798.381	754.206	790.091	864.34	874.373	792.552	796.706
135	608.573	599.831	536.785	617.801	797.57	801.408	735.342	757.533	810.07	764.816	775.448	761.478	815.318	808.133	789.7	786.579	817.276	786.579	753.911	786.195	863.733	872.159	795.316	795.528
140	600.905	594.406	532.355	613.376	793.465	798.993	735.152	754.741	800.016	765.327	771.015	752.141	811.74	809.844	787.888	778.854	816.124	788.761	750.862	783.563	856.845	867.665	794.15	793.555
145	600.077	590.488	526.077	606.869	790.854	794.63	734.71	748.412	800.641	761.138	771.976	753.42	808.684	803.663	796.343	780.142	810.957	792.116	749.745	779.231	863.634	860.086	797.341	788.102
150	596.911	586.208	525.698	605.004	789.156	790.882	731.897	748.7	803.657	757.852	770.703	748.214	806.518	803.822	787.732	776.807	803.771	780.54	747.055	773.669	857.421	863.579	790.206	790.323
155	588.795	581.703	524.431	601.375	786.473	793.801	727.843	745.088	801.33	751.985	765.958	747.139	803.122	800.195	783.644	774.374	803.799	781.004	746.027	774.283	858.144	860.95	785.888	793.013
160	588.886	584.57	522.598	600.369	784.208	791.89	729.015	744.032	794.155	751.121	767.595	744.564	803.696	798.837	783.123	770.331	802.715	772.111	740.205	773.984	854.425	862.212	785.655	790.672
165	583.749	580.138	518.073	595.988	778.56	789.624	725.479	746	789.54	746.571	763.518	746.054	798.867	792.774	784.811	768.816	800.256	774.872	739.754	766.639	856.116	857.867	786.033	784.675
170	582.527	579.507	517.597	595.952	783.182	795.339	722.463	744.862	792.512	751.745	761.898	742.787	795.294	798.854	782.584	771.15	796.643	774.771	739.772	768.384	853.63	850.612	783.73	787.195
175	579.922	579.763	517.271	592.616	782.31	786.968	723.035	744.388	789.317	748.296	760.264	743.94	797.031	793.536	776.612	767.234	794.638	770.017	738.152	767.55	853.442	858.397	784.262	785.89
180	579.09	574.54	518.829	592.535	780.396	791.126	726.382	741.622	787.269	744.286	760.175	734.675	795.99	793.614	779.28	770.733	791.13	767.035	735.075	764.343	848.435	853.118	780.116	790.237
185	574.511	569.333	516.168	585.453	777.628	791.01	718.854	743.461	789.875	744.521	754.387	738.533	787.171	791.971	774.922	768.71	787.327	763.588	735.377	762.726	848.149	853.068	777.693	790.566
190	572.205	569.894	518.474	582.578	774.988	790.765	714.087	740.125	790.526	741.592	756.329	736.213	784.383	792.875	778.112	764.315	789.666	761.288	738.513	763.901	848.442	849.036	778.877	789.074
195	569.424	567.578	514.834	579.639	778.002	782.254	719.917	732.72	779.638	738.35	755.998	733.227	780.069	784.938	775.68	763.116	785.835	756.527	726.954	755.12	844.961	853.96	779.925	781.258
200	574.08	567.087	515.709	581.363	771.586	784.087	715.314	739.67	781.336	738.729	754.118	732.417	781.61	784.952	775.382	765.937	785.963	755.724	724.704	757.064	846.842	848.424	775.354	785.14
