# Supplementary material for: Cryo-EM structures of human ZnT8 in both outward- and inward-facing conformations
Source: eLife. 2020 Jul 29;9:e58823. doi: 10.7554/eLife.58823 (PMC7428307; doi:10.7554/eLife.58823)
Supplement: Figure 2—source data 2. [file elife-58823-fig2-data2.xlsx]

## Sheet: Figure 2i
			WT	D110N D224N	△HCH	H106A H220A	H137A H345A	empty		actin level	6127
		uptake rate1	6.63875	1.5911	1.97701	1.46949	3.26983	0.88684			7137
		uptake rate2	6.37235	1.5246	2.33847	2.07953	2.80585	1.67712			6822
		uptake rate3	6.52304	1.51331	2.94006	1.78684	2.76956	0.76796			6764
		uptake rate4	5.39852	1.9855	1.62804	1.70206	3.00789	0.79666			6670
		Average rate	6.51138	1.543	2.41851	1.77862	2.94841	1.11064
	% of WT average	uptake rate1	1.01956	0.244357	0.303624	0.22568	0.502172	0.136198		protein of interest level	15941		/actin	2.60176
		uptake rate2	0.978648	0.234144	0.359136	0.319369	0.430915	0.257568			18584			2.6039
		uptake rate3	1.00179	0.23241	0.451526	0.274418	0.425341	0.117941			17268			2.53122
		uptake rate4	0.82909	0.304928	0.25003	0.261398	0.461944	0.122349			17608			2.60319
											17375			2.60495
	normalized to protein expression	uptake rate1	2.55164	0.611047	0.78105	0.564496	1.25524
		uptake rate2	2.44925	0.585509	0.923851	0.798839	1.07713
		uptake rate3	2.50716	0.581173	1.16152	0.686404	1.0632
		uptake rate4	2.07495	0.762513	0.643184	0.653836	1.15469
		Average rate	2.50268	0.592575	0.955472	0.683245	1.13185
	% of WT average	uptake rate1	1.01955	0.244155	0.312083	0.225555	0.501555	0.136198
		uptake rate2	0.978641	0.233951	0.369142	0.319191	0.430386	0.257568
		uptake rate3	1.00178	0.232218	0.464106	0.274265	0.424819	0.117941
		uptake rate4	0.829084	0.304676	0.256996	0.261252	0.461376	0.122349
		Average rate	0.957266	0.25375	0.350582	0.270066	0.454534	0.158514
		STDEV	0.0870806	0.0343567	0.0884548	0.038686	0.0352321	0.0664922
